# Supplementary material for: Open chromatin in grapevine marks candidate CREs and with other chromatin features correlates with gene expression
Source: PubMed Central journal article supplement — Plant J. 2021 Aug 6;107(6):1631–47. doi: 10.1111/tpj.15404 (PMC8518642; doi:10.1111/tpj.15404), 2021-08-06
Supplement: TPJ-107-1631-s004.pdf [file TPJ-107-1631-s004.pdf]

Expressed genes gbM v. H3K4me1

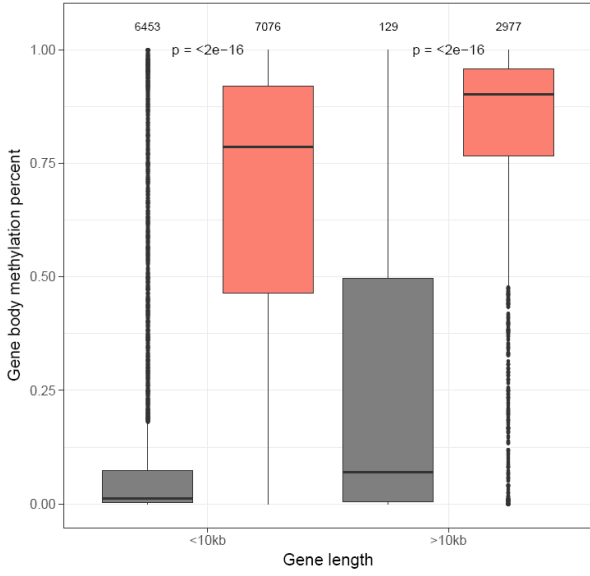

Non-expressed genes gbM v. H3K4me1

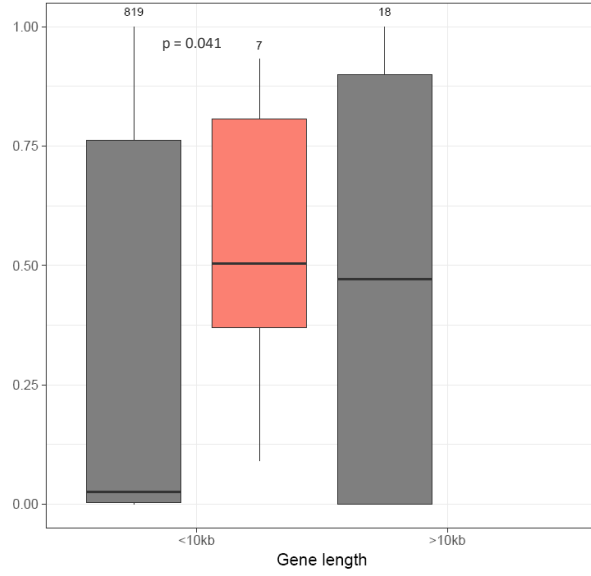

H3K4me1 status

absent

present

Expressed genes gbM v. H3K4me3

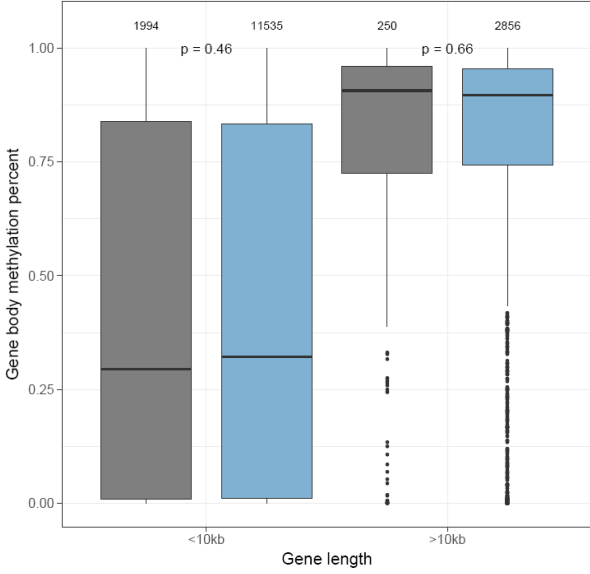

Non-expressed genes gbM v. H3K4me3

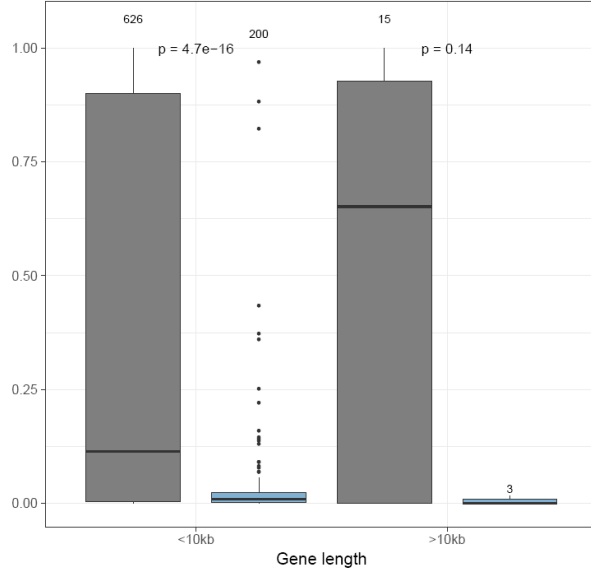

H3K4me3 status

absent

present

Expressed genes gbM v. H3K27ac

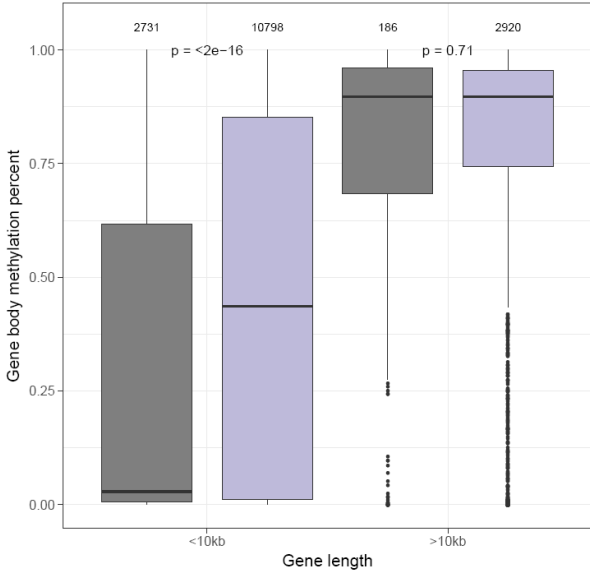

Non-expressed genes gbM v. H3K27ac

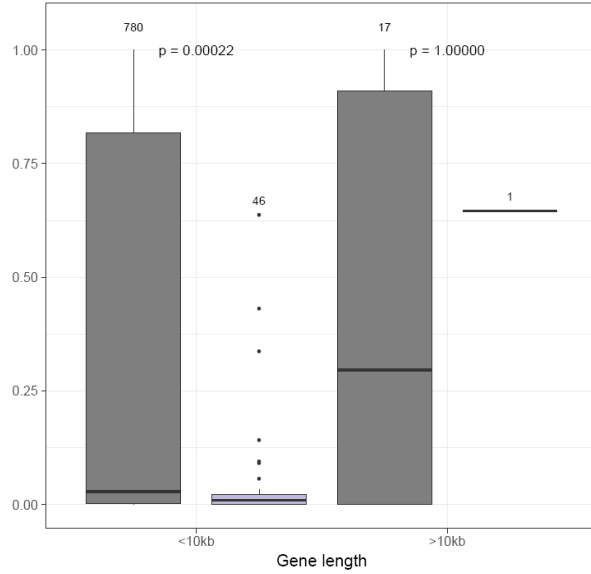

H3K27ac status

absent

present
