# Supplementary material for: Open chromatin in grapevine marks candidate CREs and with other chromatin features correlates with gene expression
Source: PubMed Central journal article supplement — Plant J. 2021 Aug 6;107(6):1631–47. doi: 10.1111/tpj.15404 (PMC8518642; doi:10.1111/tpj.15404), 2021-08-06
Supplement: TPJ-107-1631-s012.pdf [file TPJ-107-1631-s012.pdf]

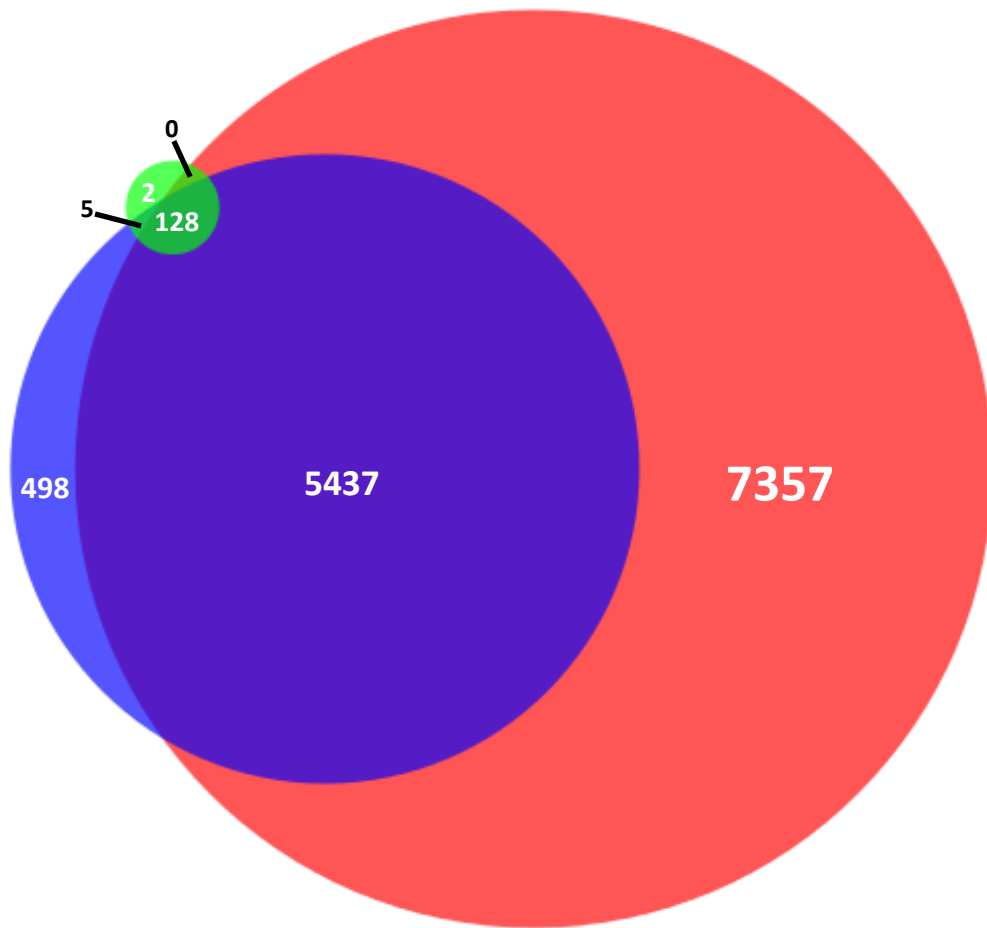

- Biological replicate 1, transposition A (12,937 total peaks)
- Biological replicate 1, transposition B (6,153 total peaks)
- Biological replicate 2, transposition A (135 total peaks)
