# Supplementary figures and images for: Open chromatin in grapevine marks candidate CREs and with other chromatin features correlates with gene expression
Source: PubMed Central journal article supplement — Plant J. 2021 Aug 6;107(6):1631–47. doi: 10.1111/tpj.15404 (PMC8518642; doi:10.1111/tpj.15404), 2021-08-06

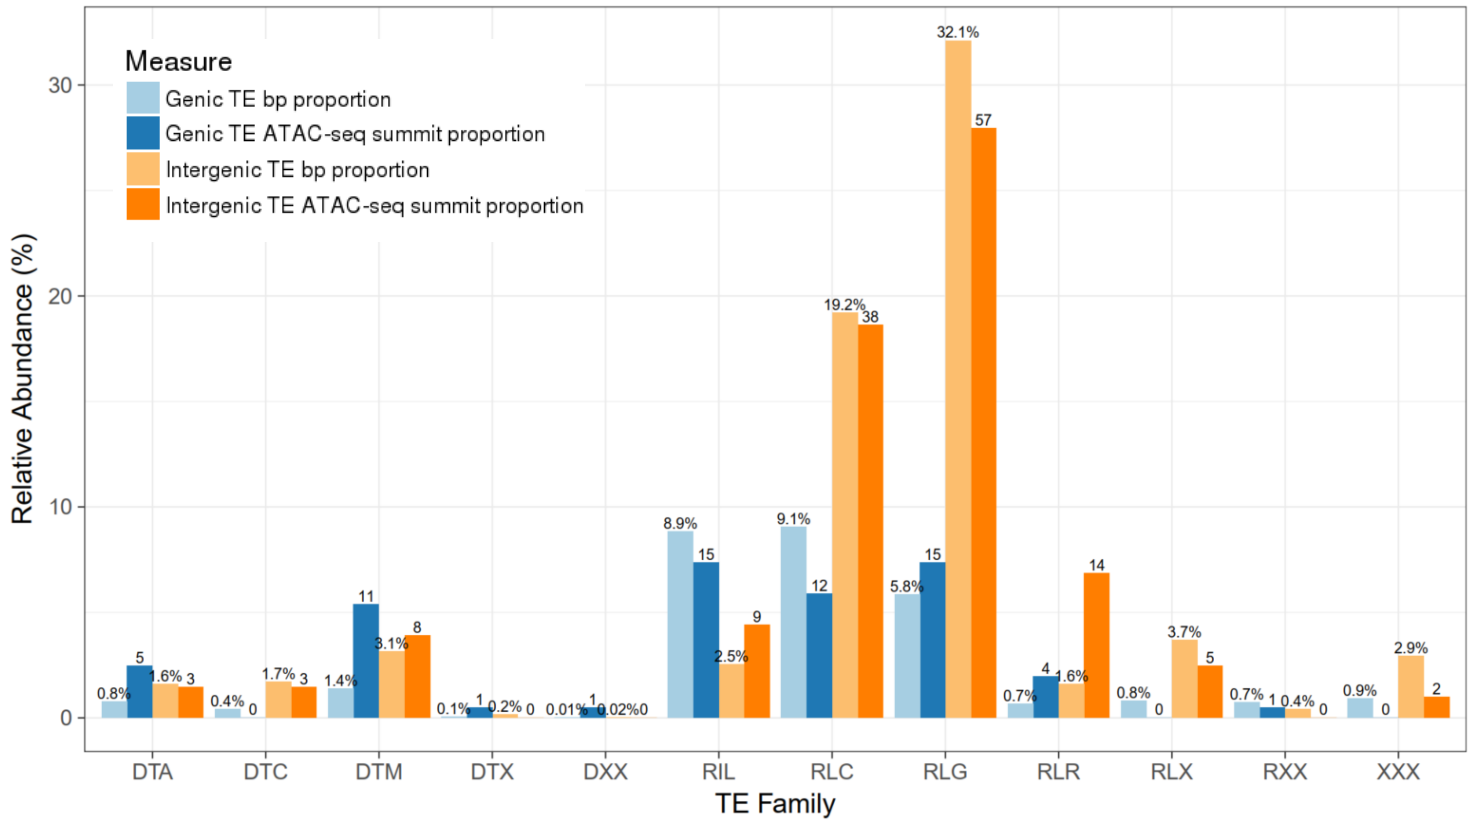

Supplement: TPJ-107-1631-s001.pdf [file TPJ-107-1631-s001.pdf]

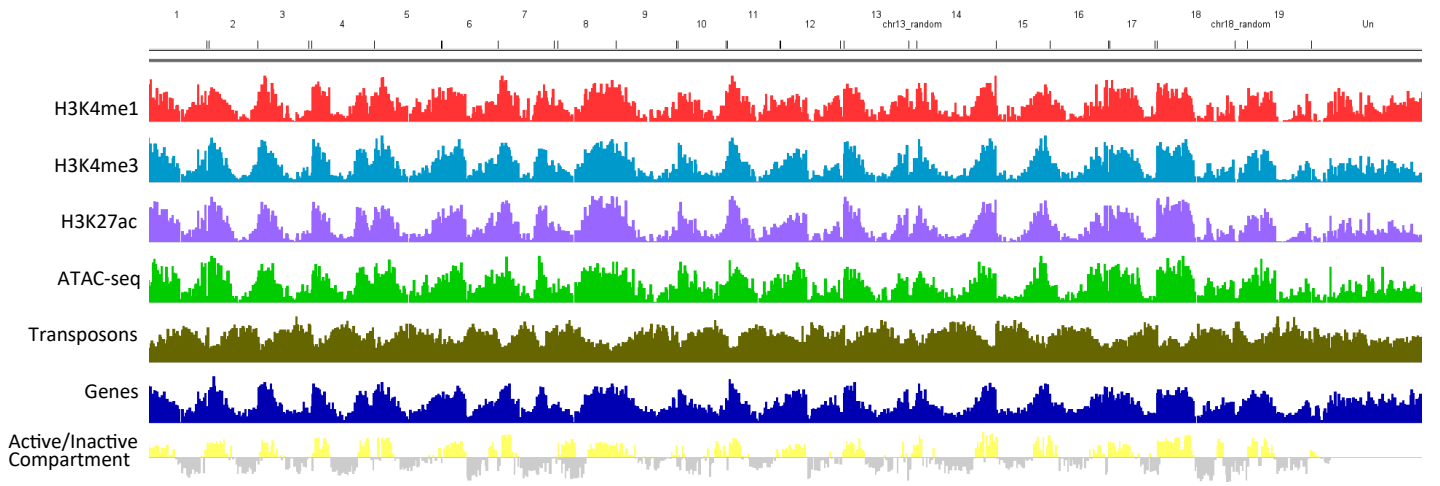

Supplement: TPJ-107-1631-s002.pdf [file TPJ-107-1631-s002.pdf]

(a)

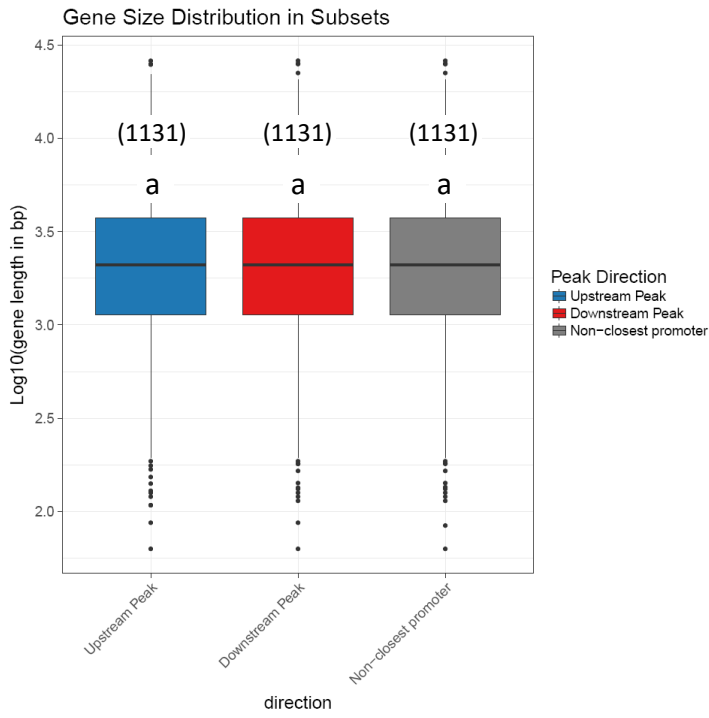

(b)

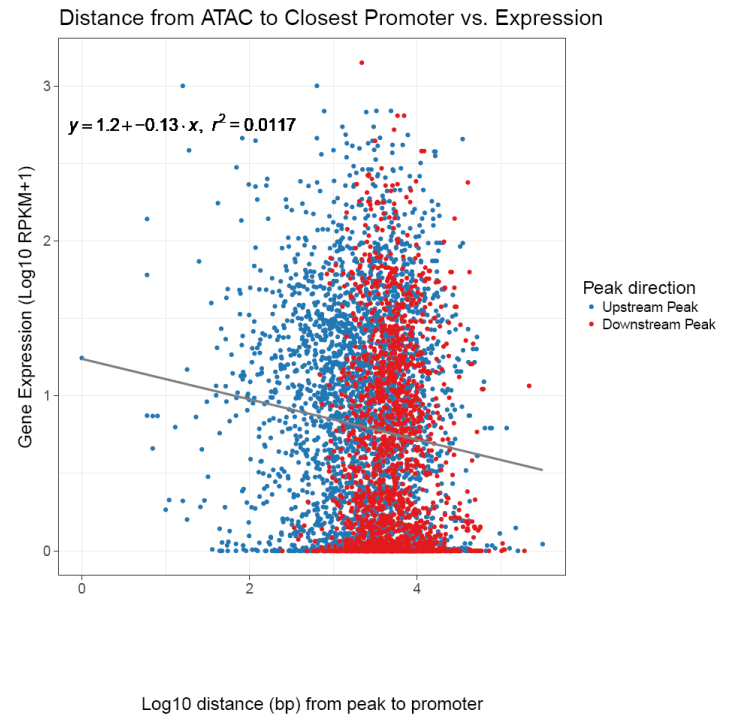

Supplement: TPJ-107-1631-s003.pdf [file TPJ-107-1631-s003.pdf]

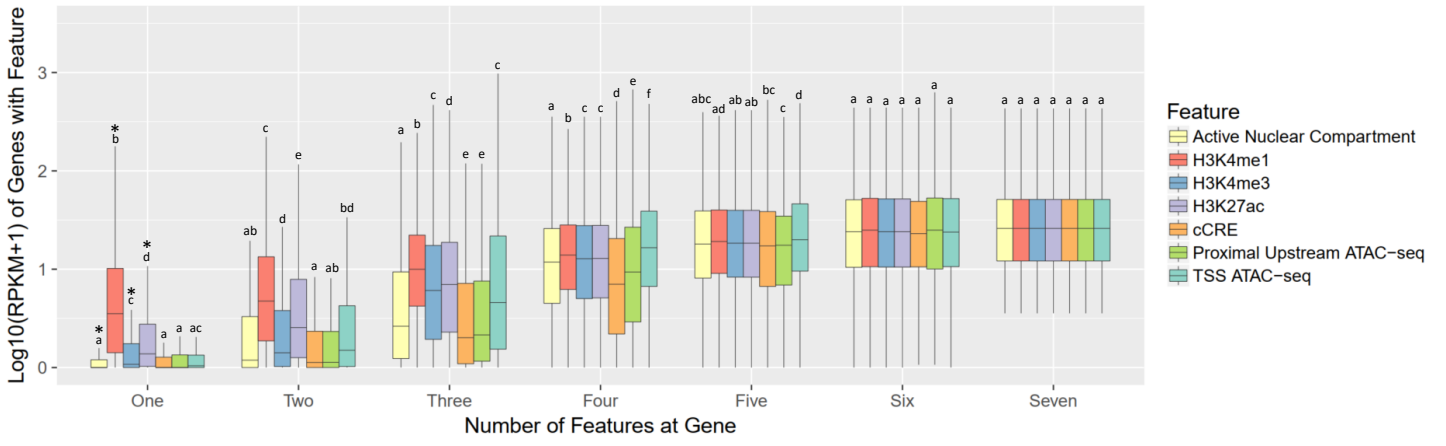

Supplement: TPJ-107-1631-s007.pdf [file TPJ-107-1631-s007.pdf]

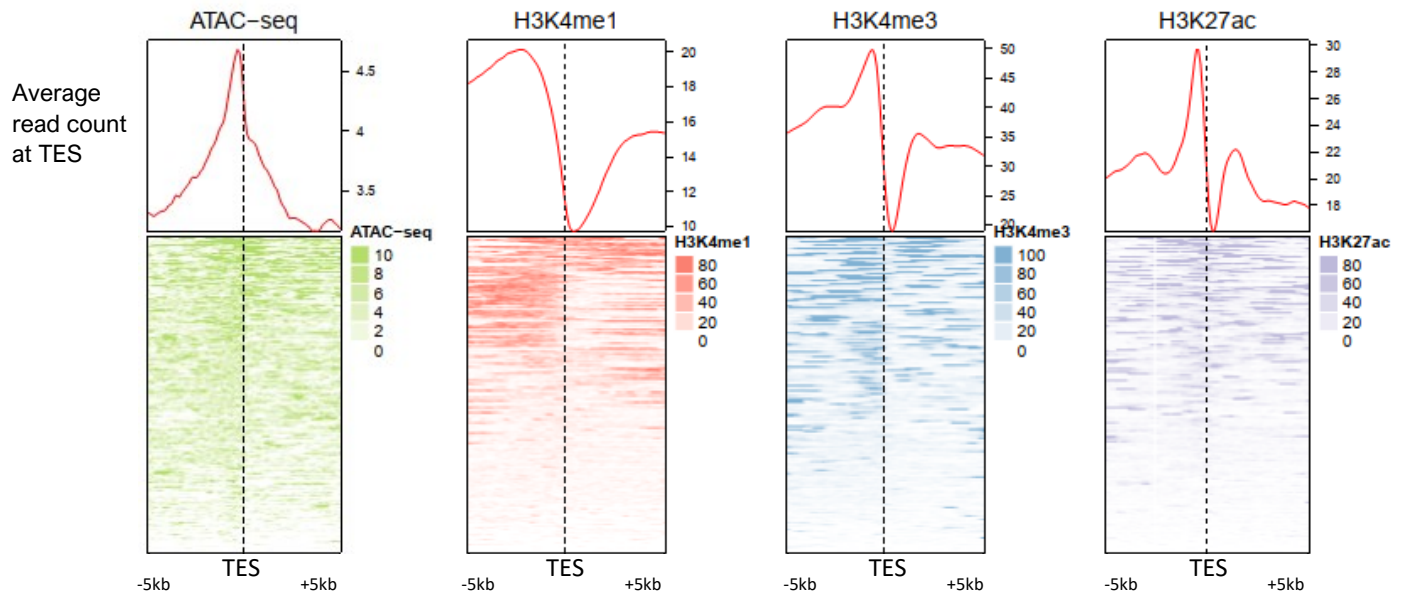

Supplement: TPJ-107-1631-s011.pdf [file TPJ-107-1631-s011.pdf]

Chr4:10,004,005-10,085,110

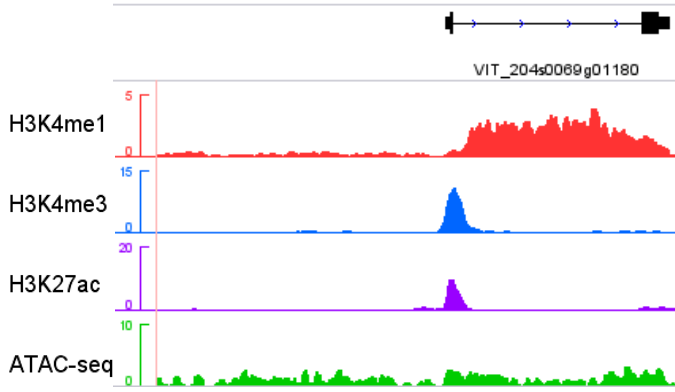

Chr8:16,223,497-16,241,079

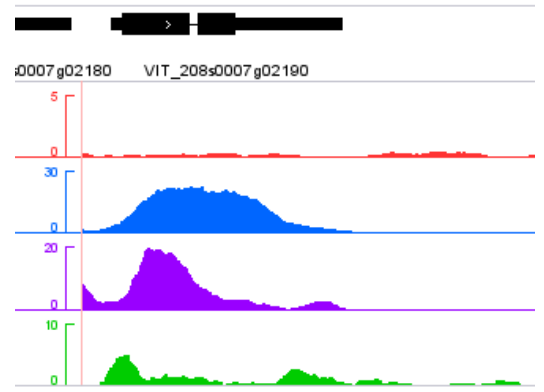

Chr11:5,457,991-5,520,256

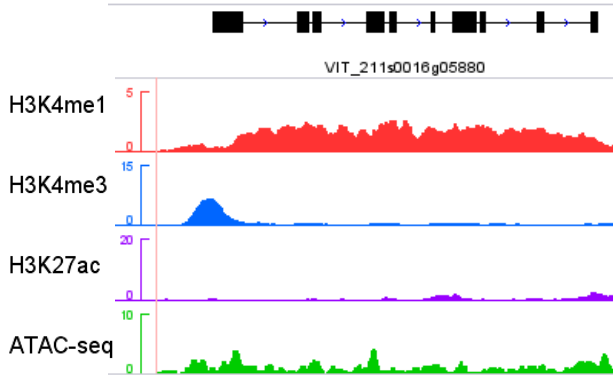

Chr7:2,009,468-2,042,497

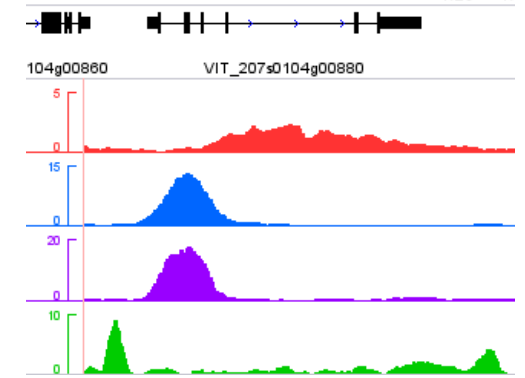

Chr10:3,435,199-3,471,871

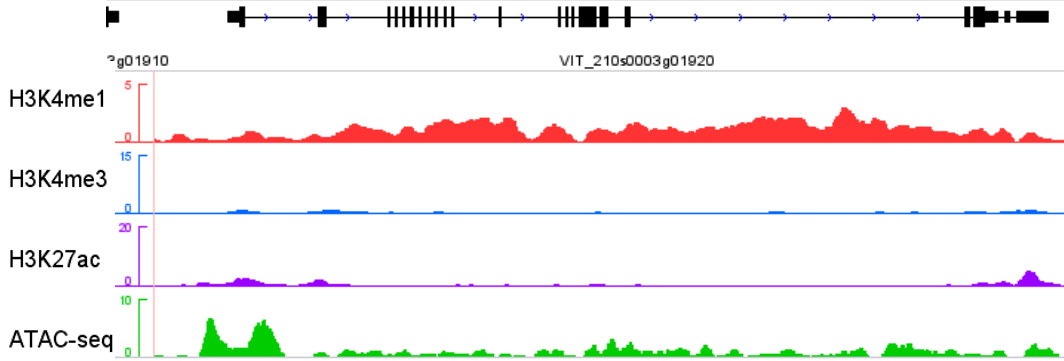

Chr5:17,731,837-17,757,206

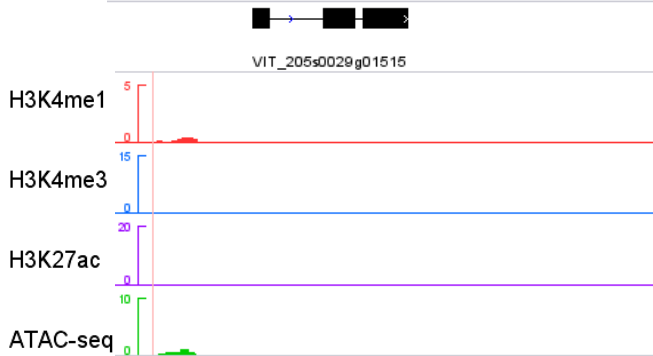

Supplement: TPJ-107-1631-s013.pdf [file TPJ-107-1631-s013.pdf]

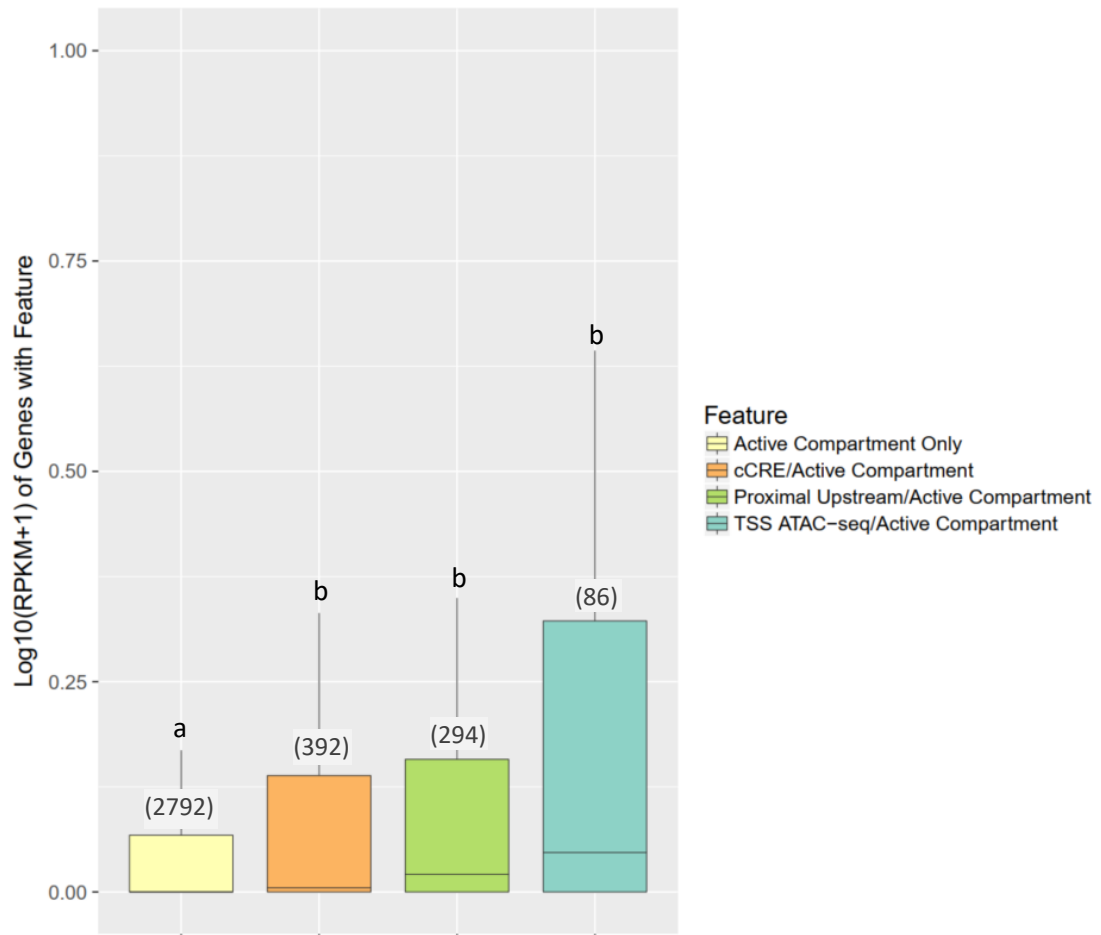

Supplement: TPJ-107-1631-s014.pdf [file TPJ-107-1631-s014.pdf]

### Gene vs H3K4me1

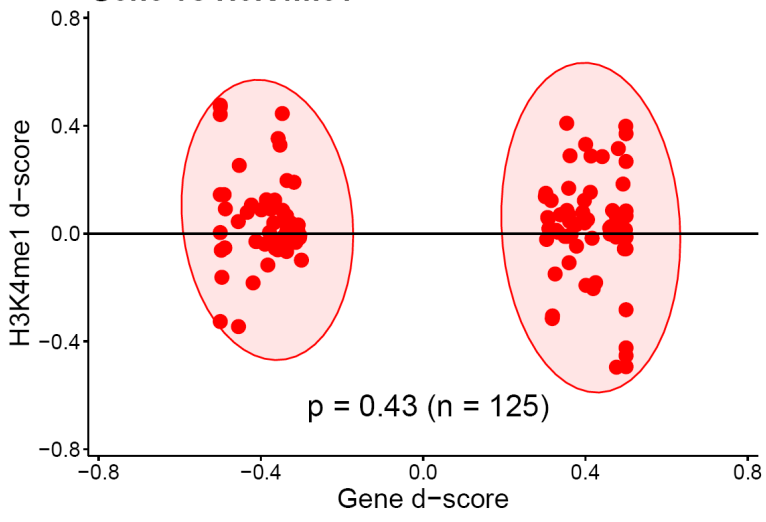

Supplement: TPJ-107-1631-s015.pdf [file TPJ-107-1631-s015.pdf]

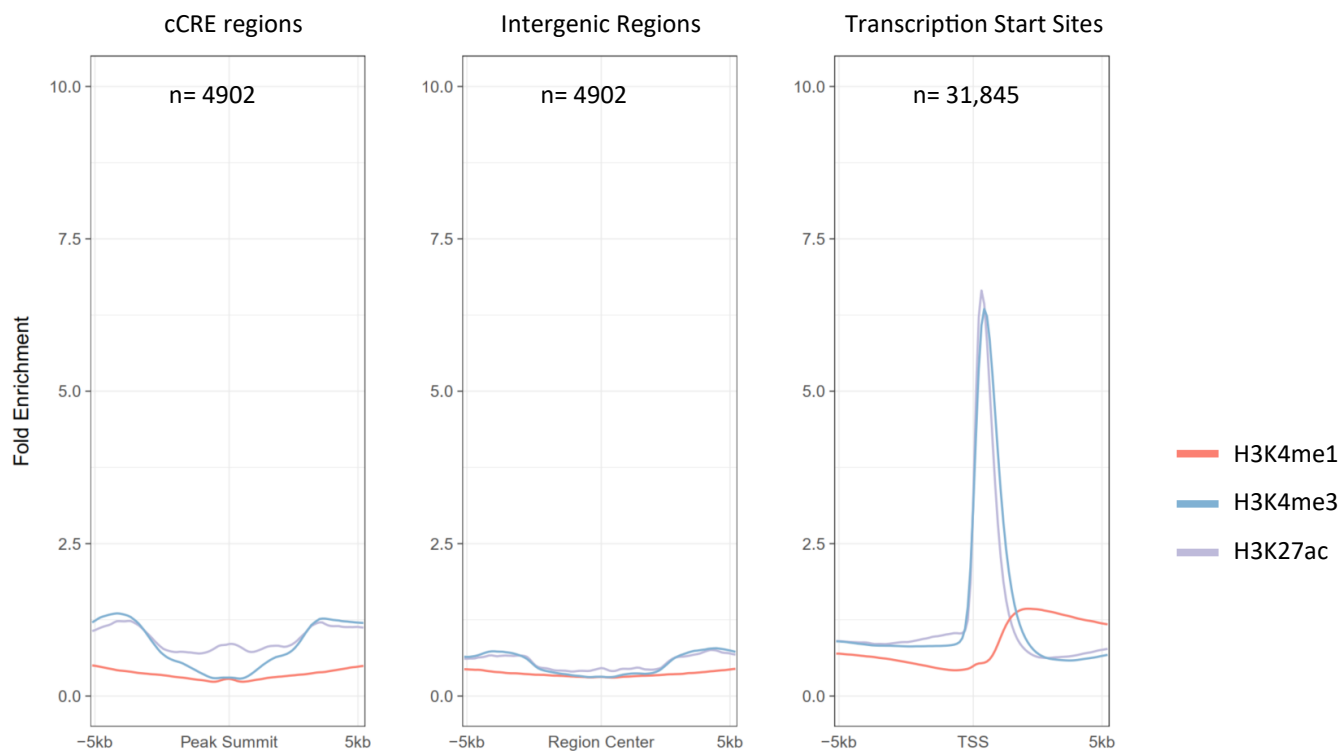

Supplement: TPJ-107-1631-s016.pdf [file TPJ-107-1631-s016.pdf]
